# Supplementary material for: Direct and Indirect Costs of Diabetes in Brazil in 2016
Source: PubMed Central journal article supplement (PMC8896241; doi:10.5334/aogh.3000), 2022-03-03
Supplement: agh-88-1-3000-s1.pdf [file agh-88-1-3000-s1.pdf]

## **Appendix A - Costs attributed to DM – Hospitalization and ambulatory**

The main complications attributed to DM are disaggregated into five groups of diseases: cardiovascular; renal; ophthalmic; neoplasm; and others. The most relevant diseases, in terms of total costs, are cardiovascular diseases due to DM. They accounted for 42.5% (US\$ 109 million) of total hospitalization and ambulatory costs. The second most important are renal diseases, which represented 19.7% of the direct costs from diseases related to DM, or US\$50.6 million. Ophthalmic diseases are also very relevant, with costs of US\$39.8 million (15.5%). Neoplasm diseases due to DM, on the other hand, accounted for 9.5% (US\$24.4 million) of those total direct costs. Finally, other diseases represented 12.8% (US\$32.8 million) of total hospitalization and ambulatory costs attributed to DM.
