# Supplementary material for: Direct and Indirect Costs of Diabetes in Brazil in 2016
Source: PubMed Central journal article supplement (PMC8896241; doi:10.5334/aogh.3000), 2022-03-03
Supplement: agh-88-1-3000-s2.pdf [file agh-88-1-3000-s2.pdf]

**Appendix B - Direct Costs - DM and Morbidities**

Table 7: Total direct costs using DRG prices for private services, in 2016 US\$.

|                             | Diabetes          |                   |                  |                  | Morbidities       |                   |                   |                   |
|-----------------------------|-------------------|-------------------|------------------|------------------|-------------------|-------------------|-------------------|-------------------|
|                             | SUS               |                   | Non-SUS          |                  | SUS               |                   | Non-SUS           |                   |
|                             | Female            | Male              | Female           | Male             | Female            | Male              | Female            | Male              |
| <b>Hospitalization cost</b> |                   |                   |                  |                  |                   |                   |                   |                   |
| <b>Groups</b>               |                   |                   |                  |                  |                   |                   |                   |                   |
| below 18 years old          | 1,839,116.9<br>0  | 1,188,866.0<br>6  | 248,501.30       | 185,734.81       |                   |                   |                   |                   |
| 18–34 years old             | 4,870,428.8<br>0  | 1,993,511.0<br>7  | 605,046.69       | 246,067.96       |                   |                   |                   |                   |
| 35–44 years old             | 2,695,680.6<br>0  | 2,769,575.1<br>0  | 585,911.13       | 219,284.76       | 1,519,300.7<br>0  | 1,747,173.0<br>0  | 235,194.33        | 281,316.92        |
| 45–54 years old             | 2,964,576.8<br>9  | 3,851,663.7<br>6  | 326,524.08       | 482,653.05       | 5,937,992.8<br>3  | 7,996,699.1<br>4  | 893,408.86        | 1,333,386.4<br>9  |
| 55–64 years old             | 4,571,851.7<br>2  | 5,578,708.4<br>7  | 515,400.04       | 800,715.57       | 16,742,800.<br>15 | 24,402,537.<br>45 | 2,869,079.9<br>6  | 4,670,614.5<br>3  |
| 65–74 years old             | 4,876,710.4<br>1  | 4,998,014.0<br>4  | 675,786.12       | 1,006,577.<br>87 | 20,975,948.<br>98 | 28,068,575.<br>63 | 4,529,913.3<br>2  | 7,072,699.1<br>8  |
| 75 years old and above      | 4,511,282.4<br>2  | 3,455,800.0<br>5  | 1,122,727.<br>09 | 939,295.89       | 17,120,949.<br>64 | 15,146,979.<br>69 | 7,405,410.6<br>9  | 5,713,332.9<br>7  |
| Total hospitalizations      | 26,329,647.<br>74 | 23,836,138.<br>56 | 4,086,896.<br>44 | 3,880,329.<br>91 | 62,296,992.<br>30 | 77,361,964.<br>90 | 15,933,007.<br>16 | 19,071,350.<br>08 |
| <b>Ambulatory cost</b>      |                   |                   |                  |                  |                   |                   |                   |                   |
| <b>Groups</b>               |                   |                   |                  |                  |                   |                   |                   |                   |
| below 18 years old          | 17,955.97         | 17,962.22         | 2,850.77         | 2,977.77         |                   |                   |                   |                   |
| 18–34 years old             | 71,891.82         | 65,147.47         | 8,077.29         | 10,052.20        |                   |                   |                   |                   |
| 35–44 years old             | 162,365.00        | 87,366.18         | 12,883.31        | 11,524.28        | 1,228,194.7<br>1  | 809,162.43        | 35,567.17         | 23,688.19         |
| 45–54 years old             | 278,178.88        | 374,373.72        | 22,690.77        | 41,619.61        | 4,580,599.4<br>4  | 3,316,093.6<br>2  | 138,798.80        | 96,475.35         |
| 55–64 years old             | 558,638.73        | 627,134.11        | 49,432.86        | 61,203.15        | 12,771,904.<br>99 | 9,949,917.6<br>6  | 440,094.42        | 342,830.44        |
| 65–74 years old             | 386,944.93        | 449,877.46        | 42,570.08        | 50,534.39        | 17,117,502.       | 13,078,640.       | 698,549.31        | 522,242.21        |

|                        |             |             |            |            |                    |                    |             |                       |
|------------------------|-------------|-------------|------------|------------|--------------------|--------------------|-------------|-----------------------|
| 75 years old and above | 259,865.19  | 122,594.29  | 40,118.78  | 21,389.76  | 79<br>9,561,726.3  | 43<br>6,608,834.2  | 501,177.85  | 306,007.15            |
| Total ambulatory       | 1,735,840.5 | 1,744,455.4 | 178,623.86 | 199,301.16 | 3<br>45,259,928.25 | 6<br>33,762,648.40 | 1,814,187.5 | 1,291,243.3           |
| Popular Pharmacy       |             |             |            |            |                    |                    |             | 304,234,400.00        |
| POF (material)         |             |             |            |            |                    |                    |             | 10,016,764.00         |
| <b>TOTAL</b>           |             |             |            |            |                    |                    |             | <b>633,033,719.62</b> |

*Notes:* DRG Brazil collects data from more than 200 hospitals in the country and 4,909 patients hospitalized due to DM or complications from the disease (2016).

Table 8: Total indirect costs using DRG prices for private services, in 2016 US\$.

|                         | Diabetes                |                | Morbidities  |               |
|-------------------------|-------------------------|----------------|--------------|---------------|
|                         | Female                  | Male           | Female       | Male          |
| <b>Absenteeism cost</b> |                         |                |              |               |
| Groups                  |                         |                |              |               |
| below 18 years old      | 580,508.81              | 425,327.28     |              |               |
| 18–34 years old         | 1,343,757.75            | 496,369.97     |              |               |
| 35–44 years old         | 988,542.75              | 731,137.94     | 192,166.86   | 225,476.36    |
| 45–54 years old         | 1,216,245.63            | 1,662,624.50   | 733,241.75   | 938,137.88    |
| 55–64 years old         | 1,928,707.50            | 2,504,171.75   | 2,045,643.75 | 2,843,334.75  |
| 65–74 years old         | 2,089,243.75            | 2,233,472.25   | 2,876,845.50 | 3,661,182.50  |
| 75 years old and above  | 2,052,454.63            | 1,535,072.00   | 3,675,572.75 | 2,817,755.25  |
| Total absenteeism       | 10,199,460.81           | 9,588,175.69   | 9,523,470.61 | 10,485,886.73 |
| <b>Early death cost</b> |                         |                |              |               |
| Groups                  |                         |                |              |               |
| 18–34 years old         | 82,067,216.67           | 88,152,875.19  |              |               |
| 35–44 years old         | 103,376,179.91          | 134,543,304.55 |              |               |
| 45–54 years old         | 167,510,805.92          | 288,475,875.30 |              |               |
| 55–64 years old         | 55,849,680.96           | 263,518,382.08 |              |               |
| Total early death       | 408,803,883.47          | 774,690,437.12 |              |               |
| INSS                    | 186,363,308.25          | 110,364,389.00 |              |               |
| <b>TOTAL</b>            | <b>1,520,019,011.69</b> |                |              |               |

Notes: DRG Brazil collects data from more than 200 hospitals in the country and 4,909 patients hospitalized due to DM or complications from the disease (2016).

|                  | <b>SUS</b>  | <b>non-SUS</b> | <b>Total</b> |
|------------------|-------------|----------------|--------------|
| Diabetes         | 137,09      | 13,377         | 150,47       |
| Attributed to DM | 4<br>124,58 | 24,551         | 1<br>149,13  |
| Total            | 8<br>261,68 | 37,928         | 9<br>299,61  |
|                  | 2           |                | 0            |

Table 9: Economic burden of DM per patient and *per capita*, in 2016 values.
